# Supplementary material for: A nanoporous carbon material derived from pomelo peels as a fiber coating for solid-phase microextraction
Source: Royal Society of Chemistry journal article supplement (doi:10.1039/c6ra24225a), 2016-01-01
Supplement: c6ra24225a1.pdf [file c6ra24225a1.pdf]

## Supporting information

### **A nanoporous carbon material derived from pomelo peels as a fiber coating for solid-phase microextraction**

Wenchang Wang, Lihong Zhang, Zhi Li, Shuaihua Zhang\*, Chun Wang and Zhi Wang\*

*Department of Chemistry, College of Science, Agricultural University of Hebei,  
Baoding 071001, China*

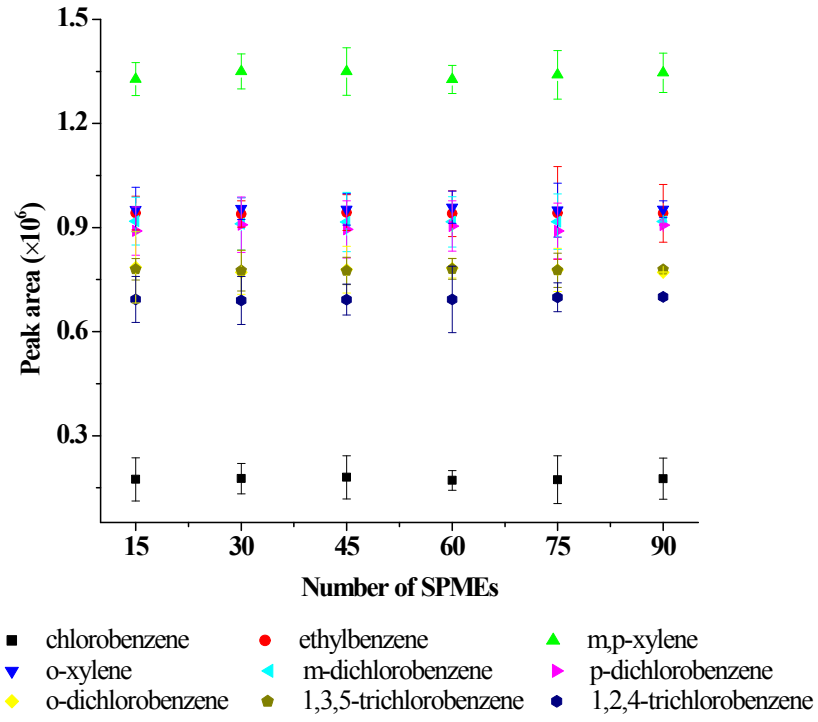

**Fig. S1.** The durability of the PP-NPC coated fiber during the SPME.

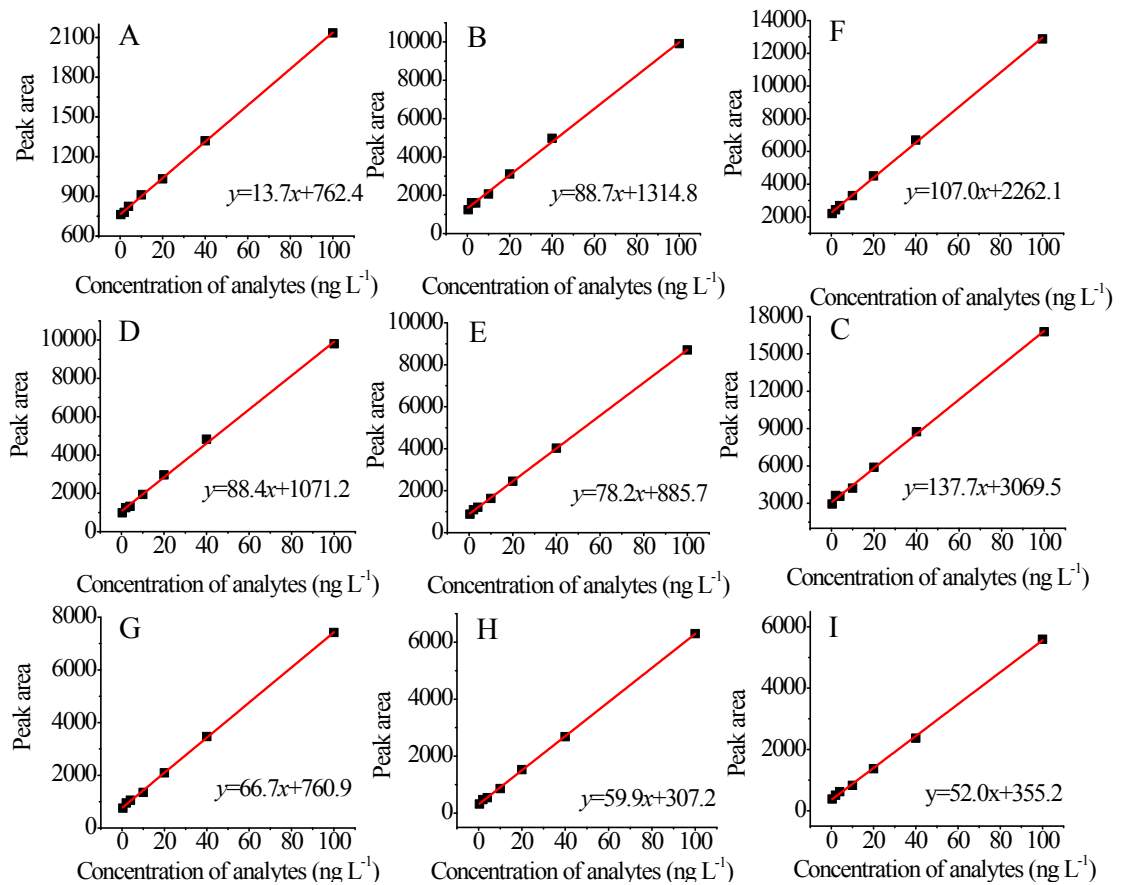

**Fig. S2.** The calibration curves for benzene homologues in water sample. Calibration curve identifications: (A) chlorobenzene, (B) ethylbenzene, (C) *m*-xylene and *p*-xylene, (D) *o*-xylene, (E) *m*-dichlorobenzene, (F) *p*-dichlorobenzene, (G) *o*-dichlorobenzene, (H) 1,3,5-trichlorobenzene and (I) 1,2,4-trichlorobenzene.

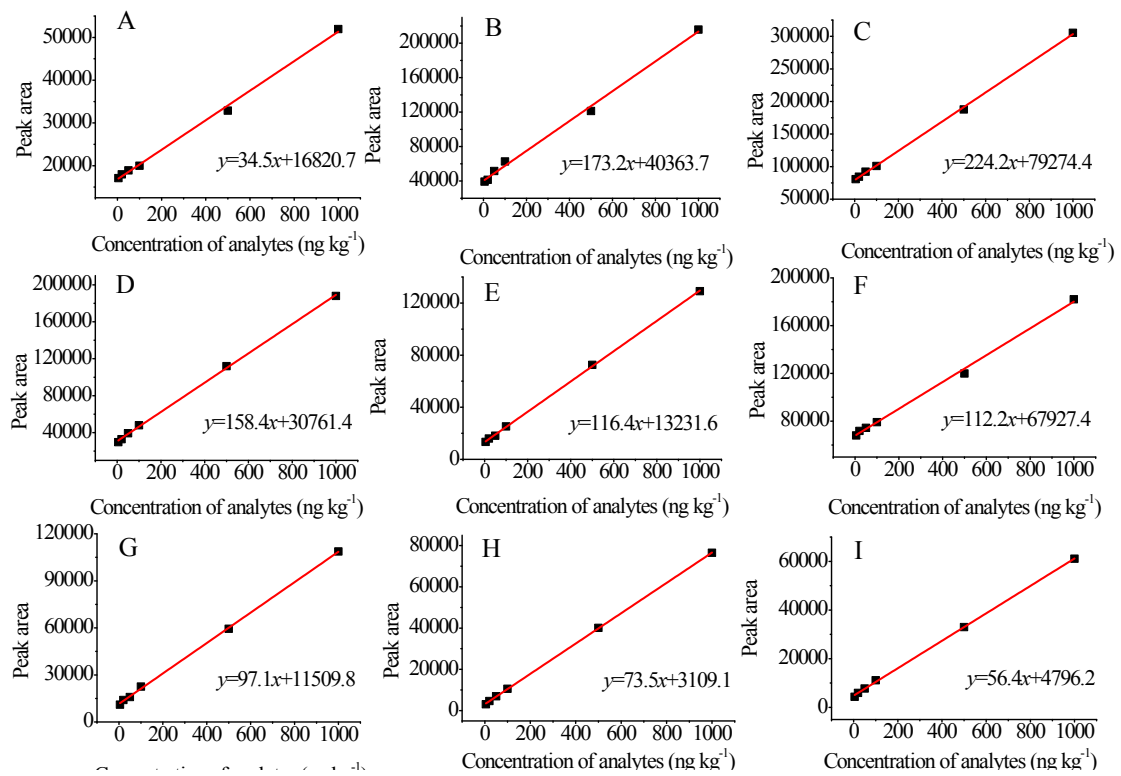

**Fig. S3.** The calibration curves for benzene homologues in soil sample. Calibration curve identifications are the same as Fig. S2.

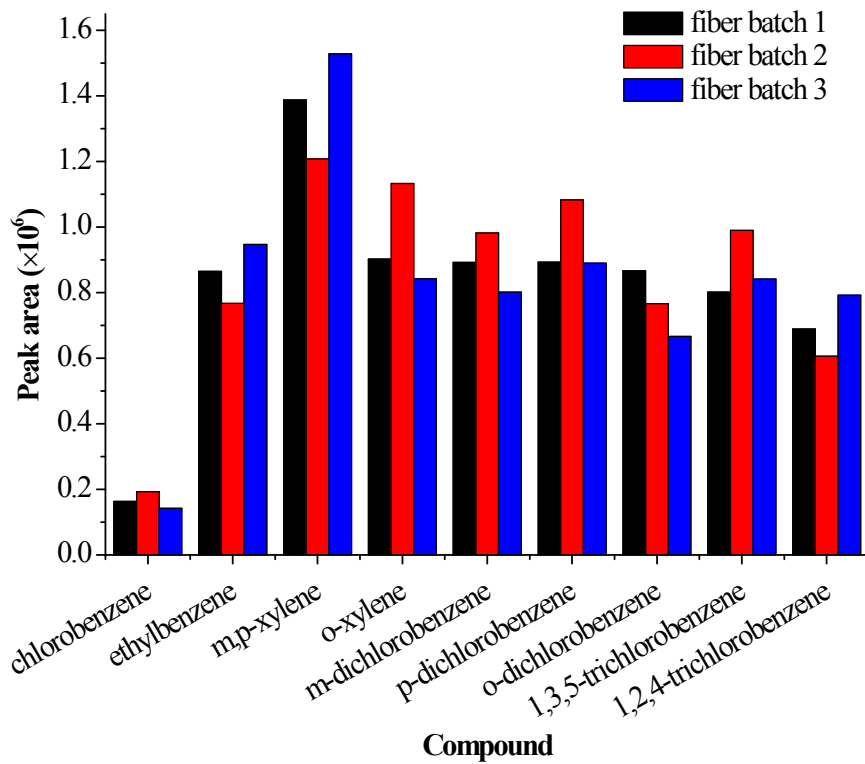

**Fig. S4** The extract performance of the PP-NPC coated fibers prepared in three different batches.
